# Supplementary material for: Association of IL10 Polymorphisms and Leprosy: A Meta-Analysis
Source: PubMed Central journal article supplement (PMC4560376; doi:10.1371/journal.pone.0136282), 2015-09-04
Supplement: pone.0136282.s001.pdf [file pone.0136282.s001.pdf]

## Meta-analysis on Genetic Association Studies Checklist | PLOS ONE

|   | Item                                                                                                                                                                                                                                                                    | Section name and paragraph number within manuscript                                                                 |
|---|-------------------------------------------------------------------------------------------------------------------------------------------------------------------------------------------------------------------------------------------------------------------------|---------------------------------------------------------------------------------------------------------------------|
|   | <b>Introduction</b>                                                                                                                                                                                                                                                     |                                                                                                                     |
| 1 | Provide a detailed justification for the polymorphism studied; if a single polymorphism was analyzed, give details as to why others were not included in the meta-analysis.                                                                                             | Paragraph 3.<br>Lines 51-55                                                                                         |
| 2 | Provide a detailed justification for the population(s) and clinical condition studied.                                                                                                                                                                                  | Paragraph 1 and 2.<br>Lines 56-60                                                                                   |
|   | <b>Methods</b>                                                                                                                                                                                                                                                          |                                                                                                                     |
| 3 | Provide full details of the search strategy employed; outline the full electronic search strategy –specific combination of keywords and any limits applied- for at least one database. Specify whether synonyms of polymorphisms/genes (e.g. SNP number) were searched. | Literature search paragraph<br>Lines 88-96                                                                          |
| 4 | Report full details on the inclusion and exclusion criteria applied for selecting studies. <i>Please list the excluded articles and the reasons for exclusion of each article in a supplementary file.</i>                                                              | Inclusion criteria indicated in literature search paragraph<br>Lines 96-98<br>Excluded studies indicated in Table 3 |
| 5 | Provide details on how the quality of the studies included in the analyses was assessed.                                                                                                                                                                                | Literature search paragraph<br>Line 99,100                                                                          |
| 6 | Describe steps taken to contact study authors to identify additional studies and to request missing data.                                                                                                                                                               | Literature search paragraph<br>Lines 94,96                                                                          |
| 7 | Describe how environmental effects were adjusted for, if this adjustment was not conducted, outline the reasons for this.                                                                                                                                               | Meta-analysis paragraph<br>Lines 132,133                                                                            |
| 8 | Describe the methods of handling heterogeneity/between-study variance.                                                                                                                                                                                                  | Meta-analysis paragraph<br>Lines 126, 127                                                                           |
| 9 | Describe how the Hardy-Weinberg equilibrium and linkage                                                                                                                                                                                                                 | Meta-analysis                                                                                                       |

|    |                                                                                                                                                                                                                                 |                                                                                                       |
|----|---------------------------------------------------------------------------------------------------------------------------------------------------------------------------------------------------------------------------------|-------------------------------------------------------------------------------------------------------|
|    | disequilibrium were assessed.                                                                                                                                                                                                   | paragraph<br>Lines 120,121<br>LD assesment<br>Linkage<br>disequilibrium<br>paragraph<br>Lines 141-150 |
| 10 | Describe and justify the choice of model for the analyses (per-allele vs per-genotype vs genetic model-free, random effects vs fixed effects).                                                                                  | Meta-analysis<br>paragraph<br>Lines 120-124.<br>Lines 127-129                                         |
| 11 | Describe whether a sensitivity analysis has been completed.                                                                                                                                                                     | Meta-analysis<br>paragraph<br>Lines 131                                                               |
| 12 | Describe whether an assessment of the effects of population stratification has been conducted.                                                                                                                                  | Meta-analysis<br>paragraph<br>Lines 132,133                                                           |
| 13 | Describe whether study-specific results have been assessed and if so the reasons for this (e.g. forest plot).                                                                                                                   | Meta-analysis<br>paragraph<br>Lines 129                                                               |
|    | <b>Results</b>                                                                                                                                                                                                                  |                                                                                                       |
| 14 | Include flow diagram for the studies included in the meta-analysis as the first figure for the manuscript                                                                                                                       | Results<br>Line 164                                                                                   |
| 15 | Report details on allele/genotype prevalence.                                                                                                                                                                                   | Results<br>Table 3. Line 415                                                                          |
| 16 | Report the effect size estimates and p values for each analysis.                                                                                                                                                                | Results<br>Table 4. Line 420                                                                          |
|    | <b>Discussion</b>                                                                                                                                                                                                               |                                                                                                       |
| 17 | Discuss the limitations of the meta-analysis, including genotyping errors/bias and publication bias.                                                                                                                            | Discussion<br>Lines 254-258                                                                           |
| 18 | If the meta-analysis identifies an association within a subgroup of the population studied but not another, discuss the implications of these results, and if applicable the possibility of subgroup-specific publication bias. | Discussion<br>Lines 251-258                                                                           |
| 19 | Discuss the suitability of the sample size employed to the                                                                                                                                                                      | Discussion                                                                                            |

|  |                                               |               |
|--|-----------------------------------------------|---------------|
|  | research question and the power of the study. | Lines 258-260 |
|--|-----------------------------------------------|---------------|
